# Supplementary material for: Circularly Polarized Laser with Chiral Nematic Cellulose Nanocrystal Cavity
Source: PubMed Central journal article supplement — ACS Nano. 2021 May 7;15(5):8753–60. doi: 10.1021/acsnano.1c01001 (PMC8266174; doi:10.1021/acsnano.1c01001), 2021-05-07
Supplement: nn1c01001_si_001.pdf [file nn1c01001_si_001.pdf]

# Supporting Information

## Circularly Polarized Laser with Chiral Nematic Cellulose Nanocrystal Cavity

*Dan Qu<sup>†</sup>, Matteo Archim<sup>‡</sup>, Andrea Camposeo<sup>§</sup>, Dario Pisignano<sup>‡,§,\*</sup>, and Eyal Zussman<sup>†</sup>*

,\*

<sup>†</sup>NanoEngineering Group, Faculty of Mechanical Engineering, Technion-Israel Institute of Technology, Haifa 3200003, Israel

<sup>‡</sup>Dipartimento di Fisica, Università di Pisa, Largo B. Pontecorvo 3, I-56127 Pisa, Italy

<sup>§</sup>NEST, Istituto Nanoscienze-CNR and Scuola Normale Superiore, Piazza San Silvestro 12, I-56127 Pisa, Italy

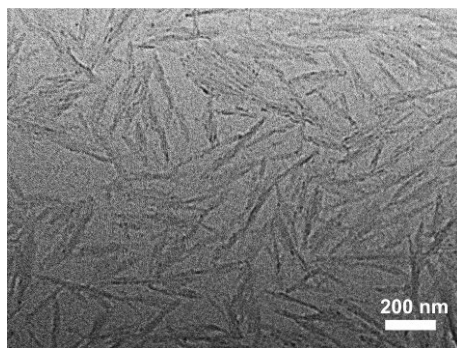

**Figure S1.** TEM image of CNC nanorods prepared from drying a dilute CNC suspension on the grid.

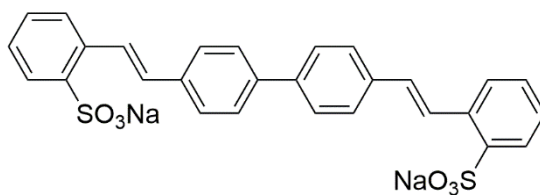

**Figure S2.** Molecular structure of SB.

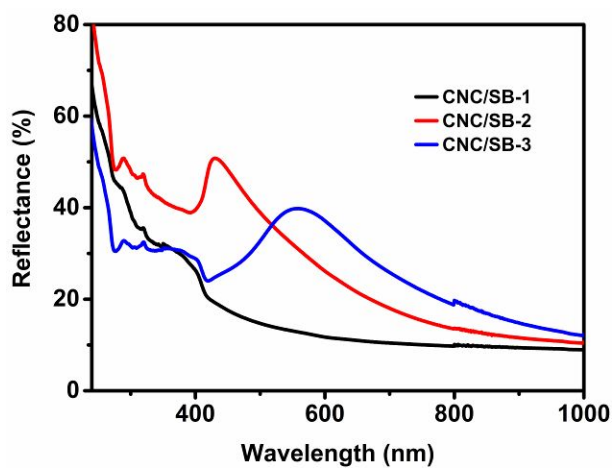

**Figure S3.** Reflectance spectra of CNC/SB films.

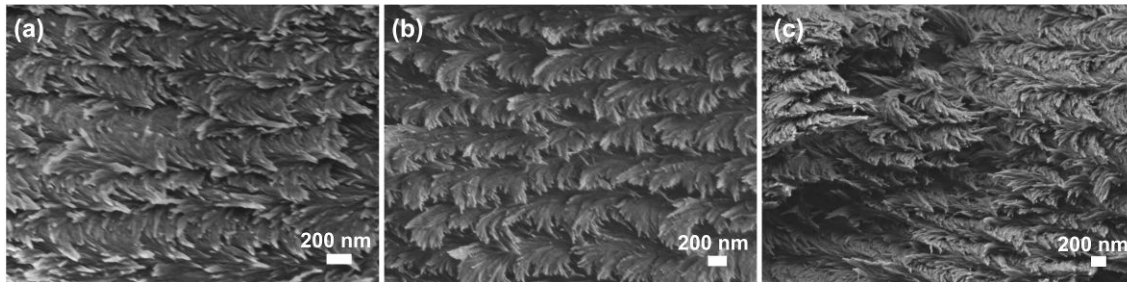

**Figure S4.** SEM images of (a) CNC/SB-1, (b) CNC/SB-2 and (c) CNC/SB-3 films, showing typical left-handed chiral nematic structure. The images are taken in oblique cross-section.

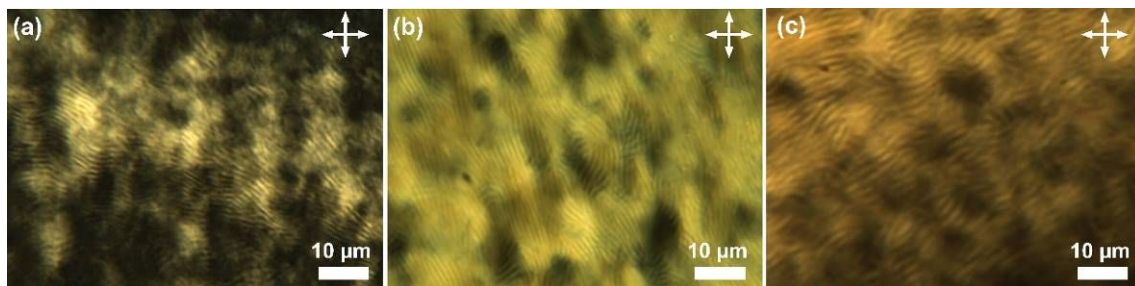

**Figure S5.** POM images of (a) CNC/SB-1, (b) CNC/SB-2 and (c) CNC/SB-3 suspensions during evaporation, showing fingerprint textures, indicating the formation of chiral nematic structures (the crossed arrows indicate the analyzer and polarizer and the images are taken in transmission mode).

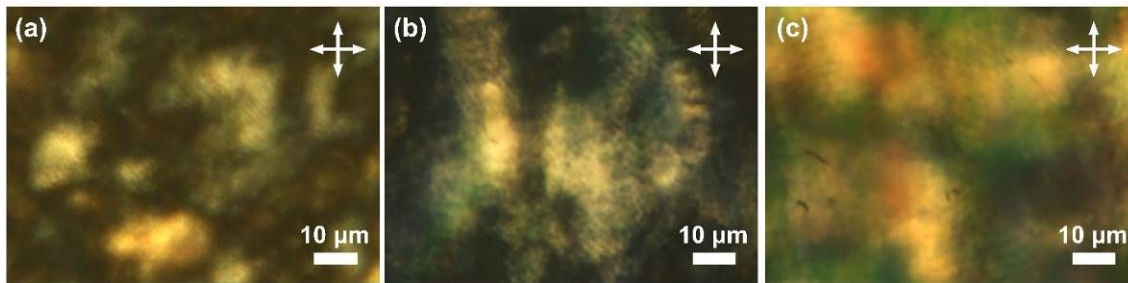

**Figure S6.** High-resolution POM images of (a) CNC/SB-1, (b) CNC/SB-2 and (c) CNC/SB-3 film, showing birefringence and fingerprint textures, the crossed arrows indicate the crossed analyzer and polarizer (the images are taken in transmission mode).

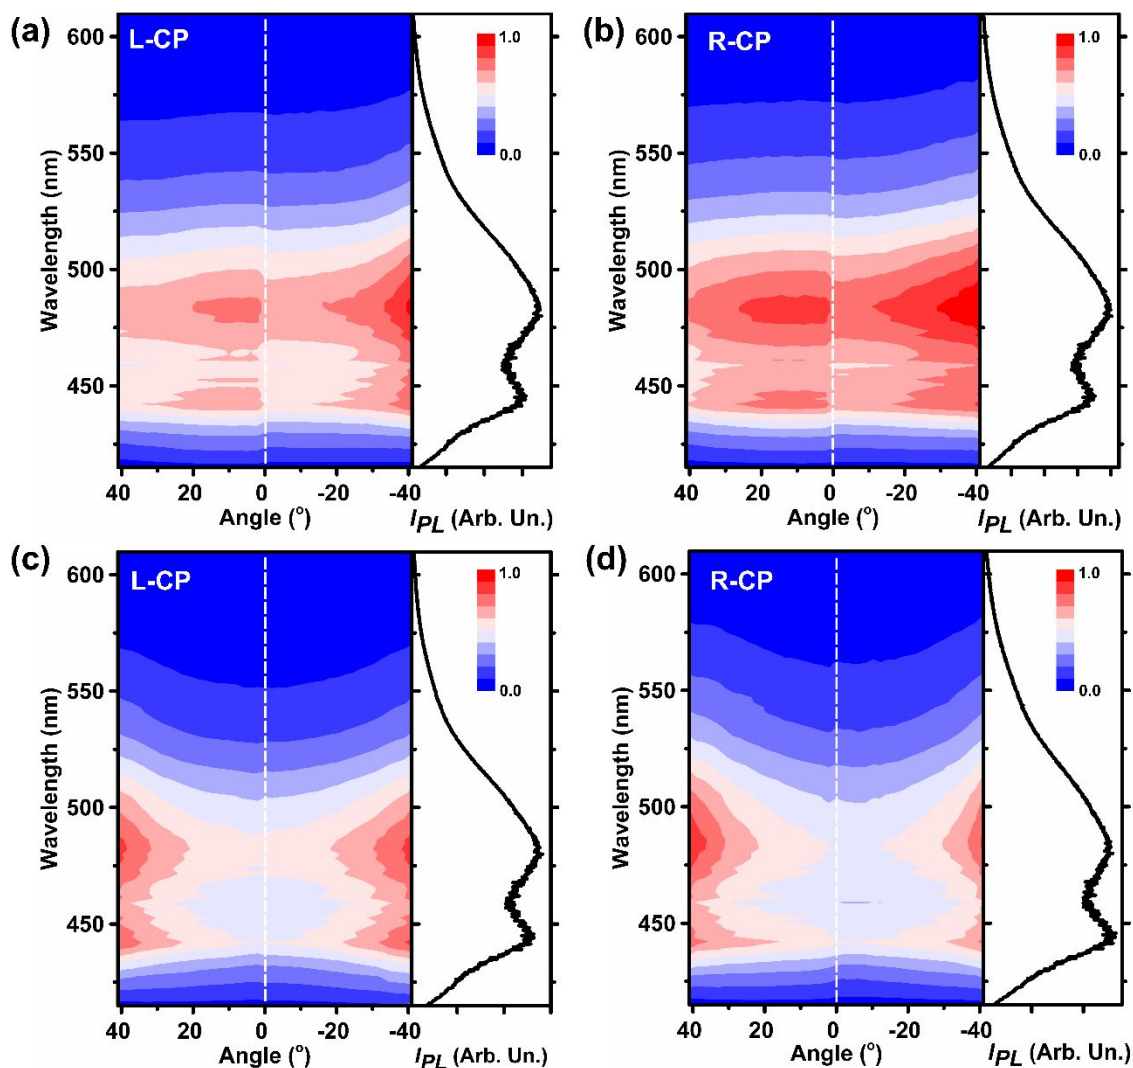

**Figure S7.** Angular-resolved, circularly polarized PL spectra of (a,b) CNC/SB-1 and (c,d) CNC/SB-2 film. The films are excited with a L-CP laser. Maps show the PL spectra with L-CP polarization [(a) and (c)], or with R-CP polarization [(b) and (d)]. The spectra collected at  $0^\circ$  (collection direction perpendicular to the sample surface, which is highlighted by the dashed lines in the maps) are shown on the right of each map.

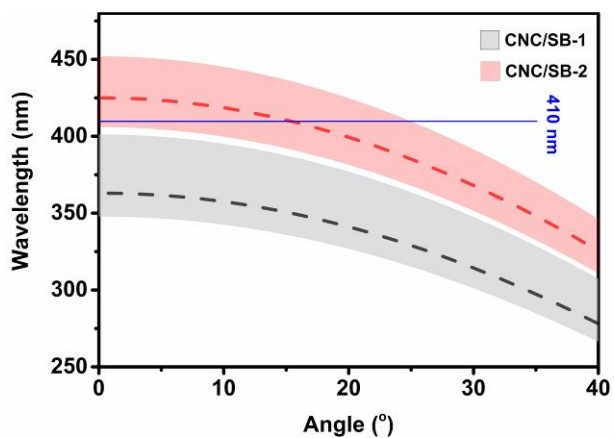

**Figure S8.** Angular-dependent PBG of CNC/SB-1 and CNC/SB-2 films. The dashed line indicates the calculated reflection peak. The blue solid line is the excitation light at 410 nm.

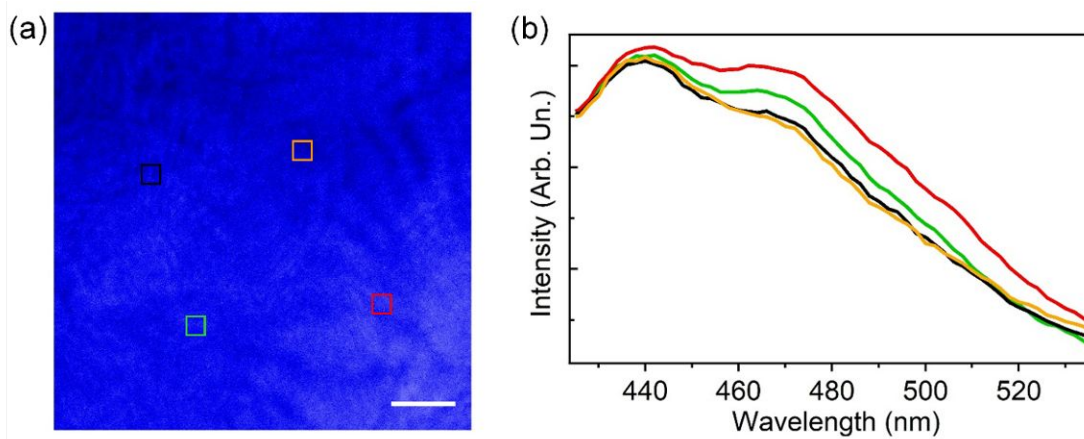

**Figure S9.** (a) Fluorescence confocal micrograph of a CNC/SB-2 film. Scale bar: 10  $\mu\text{m}$ .  
(b) Spatially-resolved emission spectra collected in the areas marked by black, red, green and orange boxes in (a).

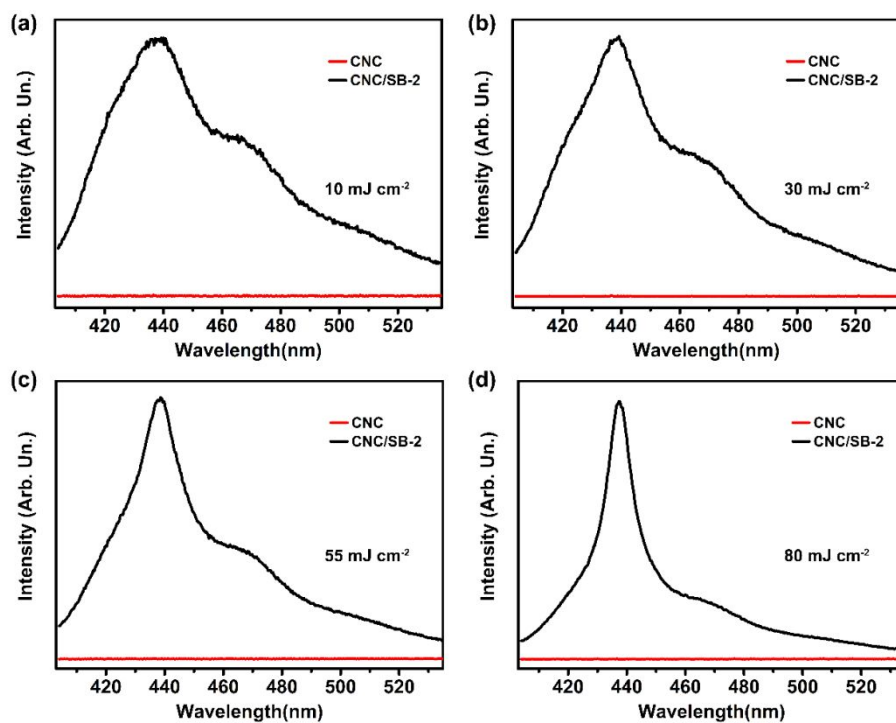

**Figure S10.** Comparison of the emission spectra of pristine CNC (red curves) and CNC/SB-2 (black curves) films. The excitation fluence is: (a) 10  $\text{mJ cm}^{-2}$ , (b) 30  $\text{mJ cm}^{-2}$ , (c) 55  $\text{mJ cm}^{-2}$  and (d) 80  $\text{mJ cm}^{-2}$ .

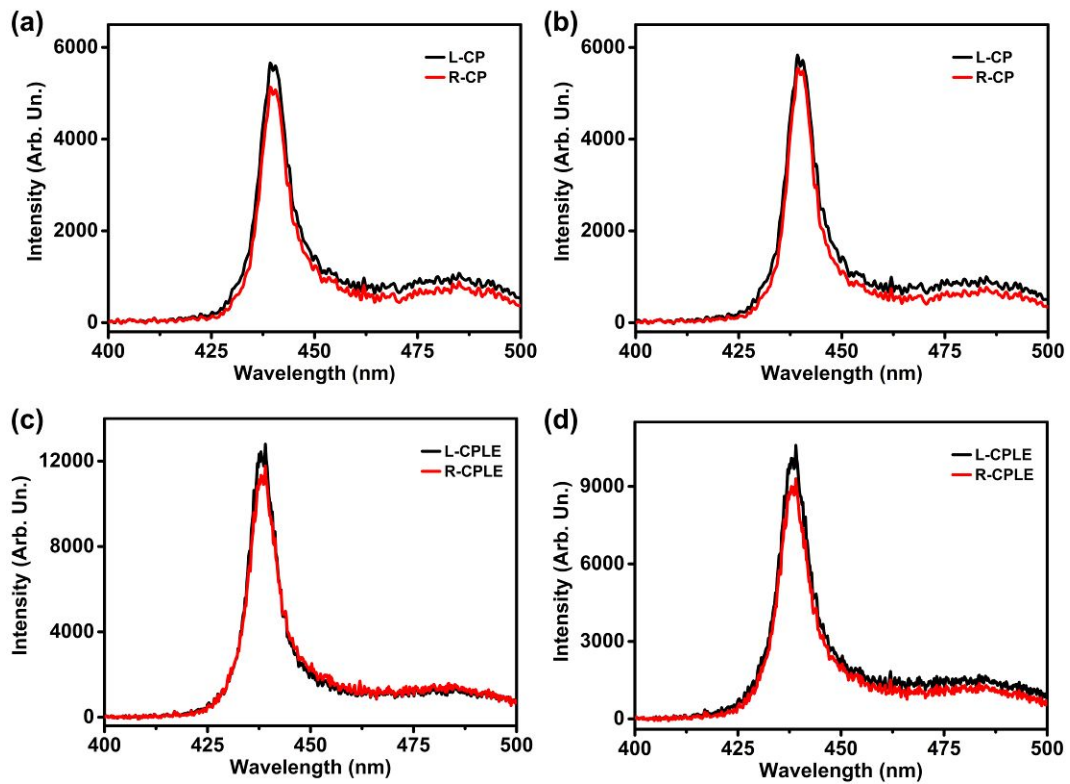

**Figure S11.** L-CP and R-CP emission spectra of CNC/SB-1 upon excitation with (a) L-CP and (b) R-CP laser. L-CPLE and R-CPLE spectra of CNC/SB-3 upon excitation with (c) L-CP and (d) R-CP laser. The excitation fluence is  $90 \text{ mJ cm}^{-2}$
